# Supplementary material
Source: PubMed Central journal article supplement (PMC7092642)
Supplement: NIHMS1575098-supplement-1.pdf [file NIHMS1575098-supplement-1.pdf]

**Supplemental eFigure 1**

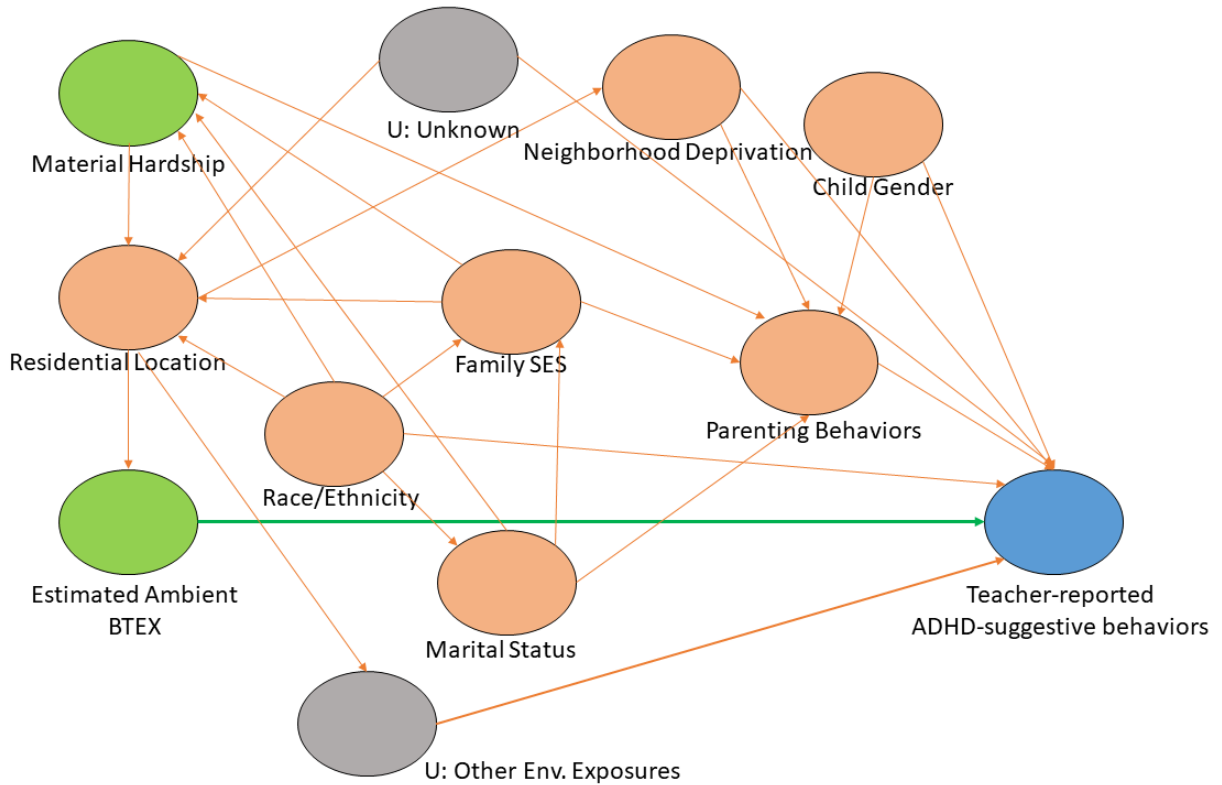

**Supplemental eFigure 1:** Directed Acyclic Graph representing the relationship between estimated ambient BTEX, material hardship and teacher-reported ADHD-suggestive behaviors. Exposures colored in green, outcome in blue, covariates in orange and unmeasured variables in grey. Abbreviations: ADHD-attention deficit/hyperactivity disorder; BTEX-benzene, toluene, ethylbenzene and xylenes; U-Unmeasured Variable
